# Supplementary material for: One pot rapid synthesis of ultra high strength hydrophobic bulk silica aerogels
Source: Royal Society of Chemistry journal article supplement (doi:10.1039/d0qm00234h), 2020-01-01
Supplement: d0qm00234h1.pdf [file d0qm00234h1.pdf]

## Electronic Supporting Information

# One pot rapid synthesis of ultra high strength hydrophobic silica aerogels

Xian Yue, Junyong Chen, Huaxin Li, Zhou Xiao, Xianbo Yu, and Junhui Xiang \*

*Center of Materials Science and Optoelectronics Engineering, College of Materials  
Sciences , University of Chinese Academy of Sciences, Beijing 100049, P. R. China.*

***E-mail:*** [xiangjh@ucas.ac.cn](mailto:xiangjh@ucas.ac.cn) (J.X.)

**Table S1.** Preparation of silica aerogels with different MTMS molar ratio.

| NO.  | MTMS | H <sub>2</sub> O | H <sub>2</sub> C <sub>2</sub> O <sub>4</sub><br>[g] | Tert-butanol<br>[ml] | (NH <sub>3</sub> • H <sub>2</sub> O)<br>[ml] <sup>a</sup> | Aging time<br>[h] |
|------|------|------------------|-----------------------------------------------------|----------------------|-----------------------------------------------------------|-------------------|
| M-8  | 8    | 10               | 0.072                                               | 10                   | 0.8                                                       | 21                |
| M-9  | 9    | 10               | 0.072                                               | 10                   | 0.8                                                       | 21                |
| M-10 | 10   | 10               | 0.072                                               | 10                   | 0.8                                                       | 21                |
| M-11 | 11   | 10               | 0.072                                               | 10                   | 0.8                                                       | 21                |
| M-12 | 12   | 10               | 0.072                                               | 10                   | 0.8                                                       | 21                |
| M-13 | 13   | 10               | 0.072                                               | 10                   | 0.8                                                       | 21                |
| M-14 | 14   | 10               | 0.072                                               | 10                   | 0.8                                                       | 21                |
| M-15 | 15   | 10               | 0.072                                               | 10                   | 0.8                                                       | 21                |

<sup>a</sup>( Ammonia concentration is 10M).



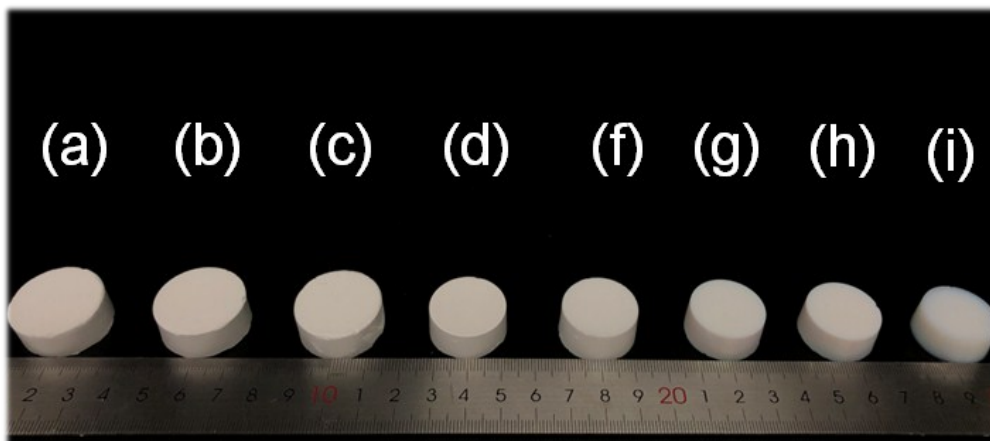

**Fig. S1** silica aerogels with different MTMS molar ratio and supercritical drying: (a) M-8; (b) M-9; (c) M-10; (d) M-11; (e) M-12; (f) M-13; (g) M-14; (h) M-15.

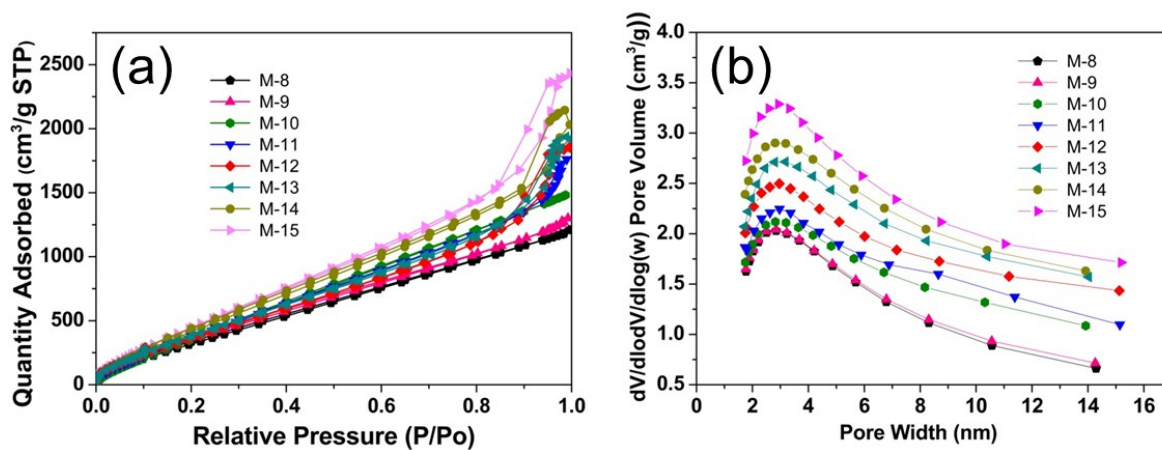

**Fig. S2** (a) N<sub>2</sub> adsorption-desorption curve of SiO<sub>2</sub> aerogels with supercritical drying; (d) BJH pore size distribution curve calculated from the adsorption curve.

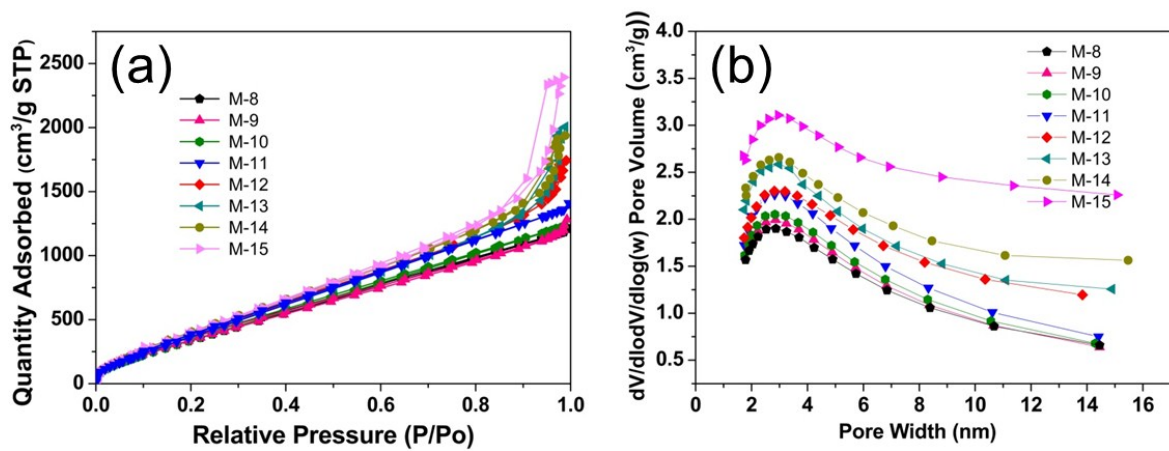

Fig. S3 (a)  $N_2$  adsorption-desorption curve of  $SiO_2$  aerogels with freeze drying; (d) BJH pore size distribution curve calculated from the adsorption curve.

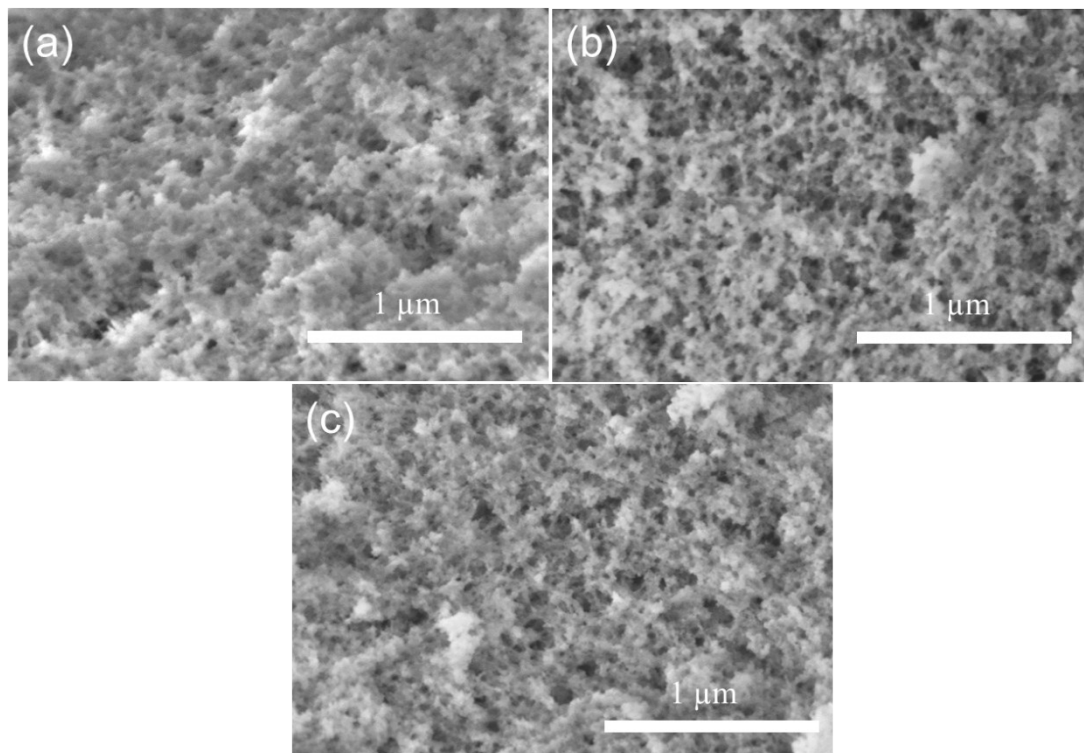

**Fig. S4** SEM images of M-13 drying in different ways at same magnifications: (a) atmospheric drying; (b) freeze drying; (c) supercritical drying.

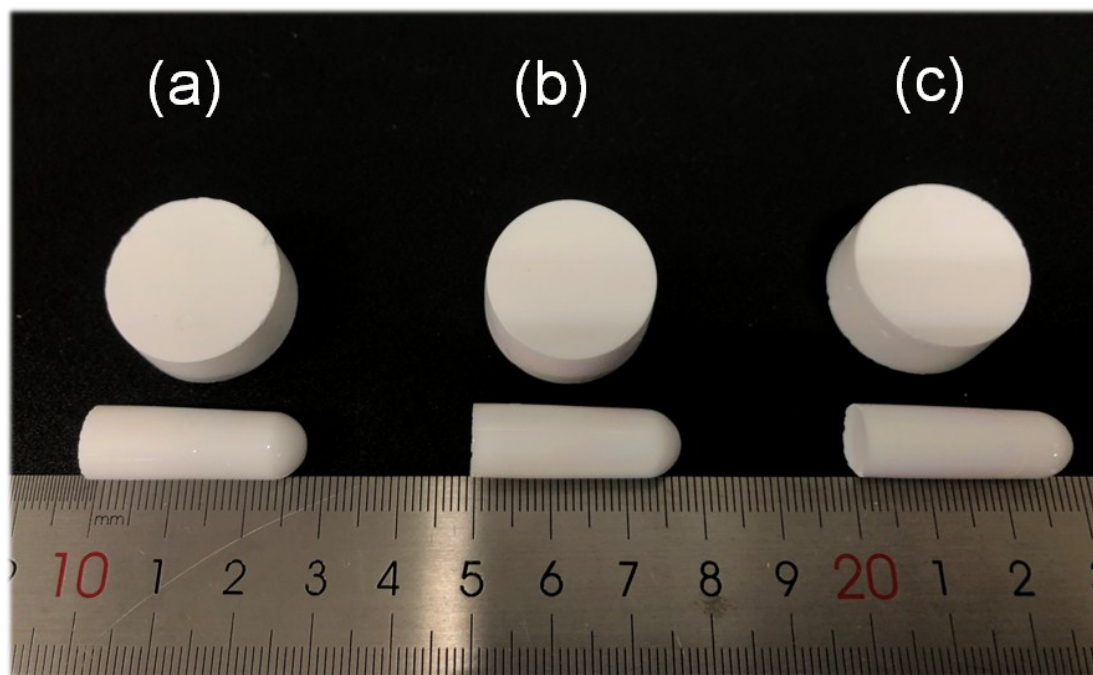

**Fig. S5** Bulk samples of M-13 prepared by (a) atmospheric drying; (b) freeze drying; (c) supercritical drying.

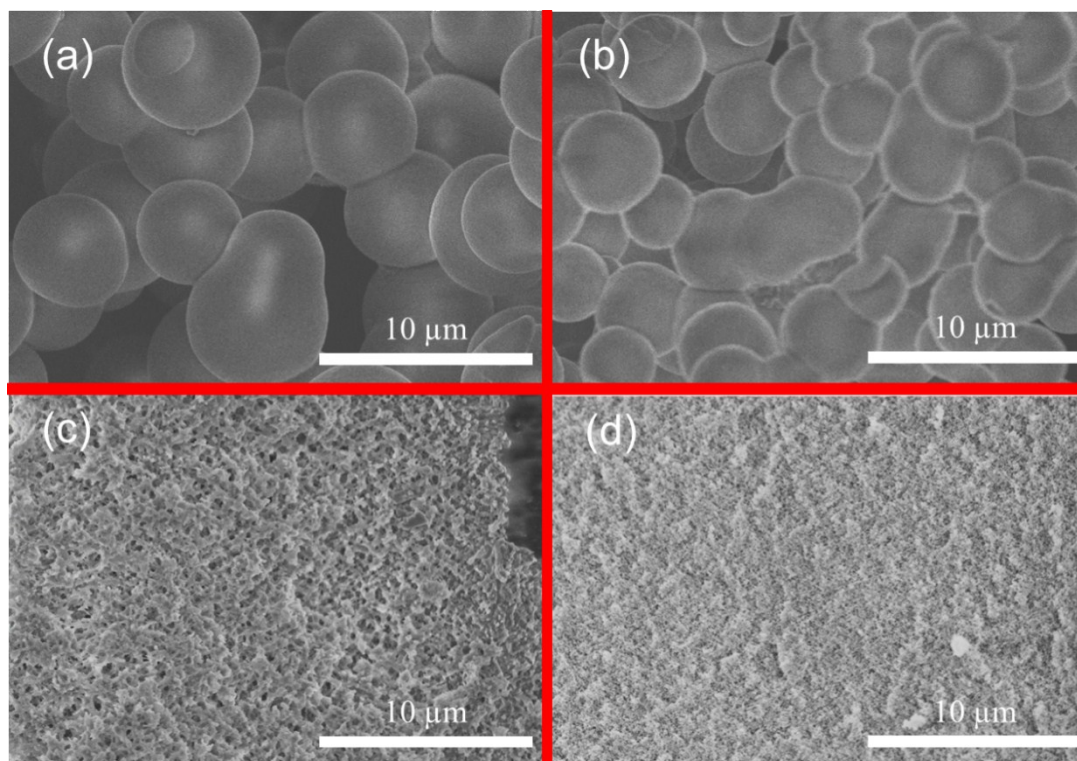

**Fig. S6** SEM images of SiO<sub>2</sub> aerogels at same magnifications by atmospheric drying: (a) M-8; (b) M-10; (c) M-11; (d) M-12.

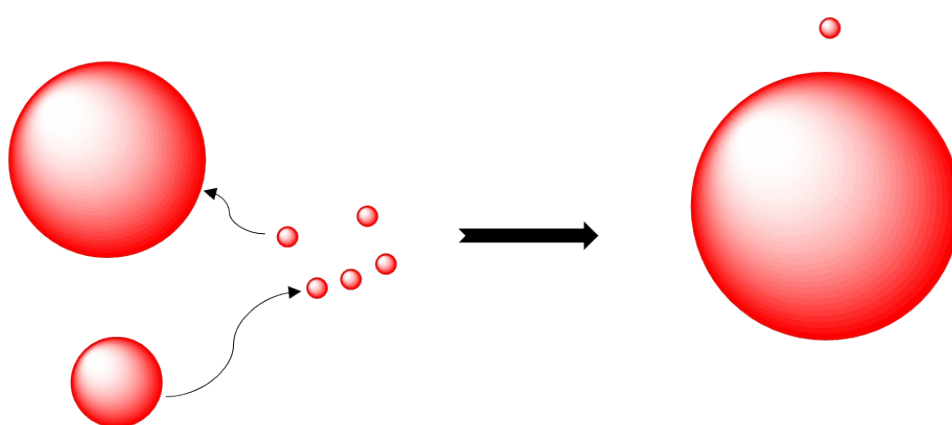

**Fig. S7** Schematic illustration of oswald ripening process.

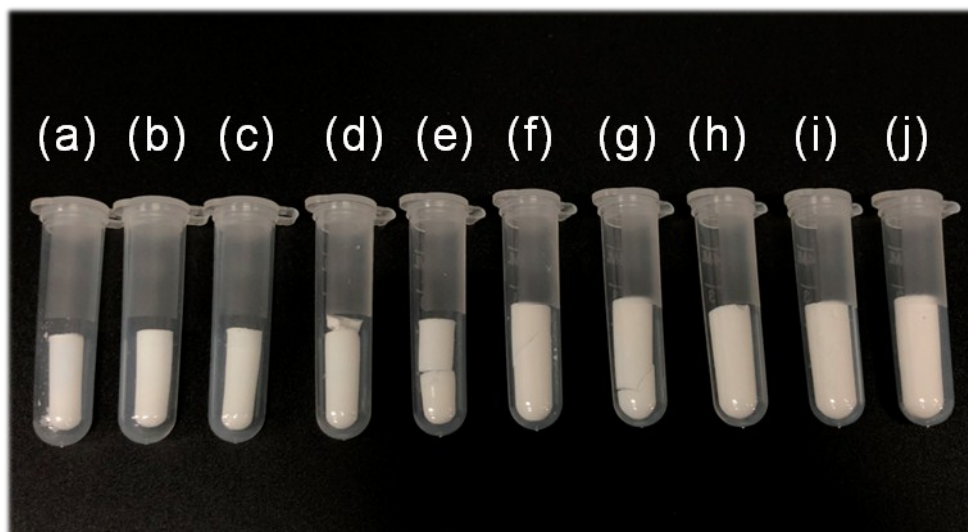

**Fig. S8** Block samples of M-13 with atmospheric drying aged for (a) 2h; (b) 4h; (c) 6h; (d) 8h; (e) 10h; (f) 12h; (g) 15h; (h) 18h; (i) 21h; (j) 24h.

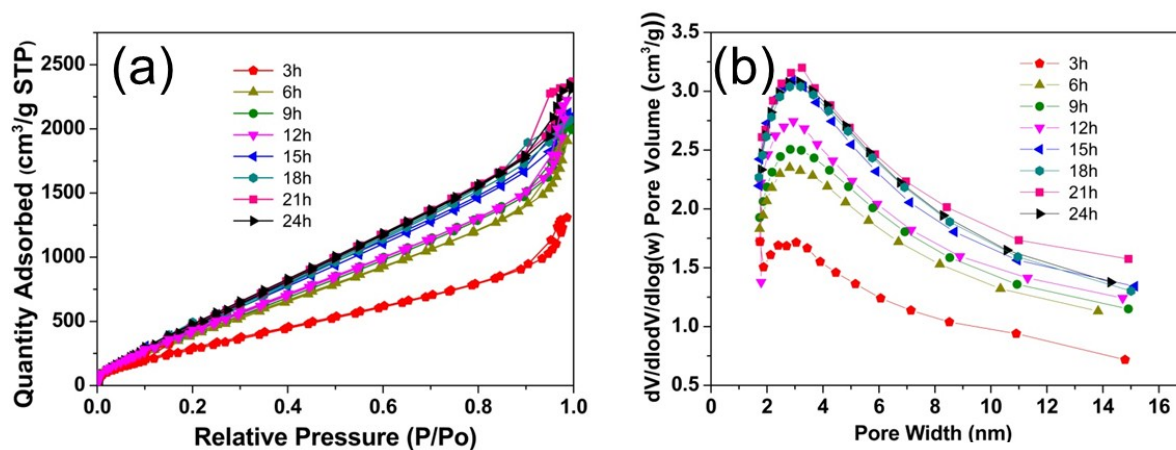

**Fig. S9** (a)  $N_2$  adsorption-desorption curve of M-13 with atmospheric drying under different aging time; (b) BJH pore size distribution curve calculated from the adsorption curve.



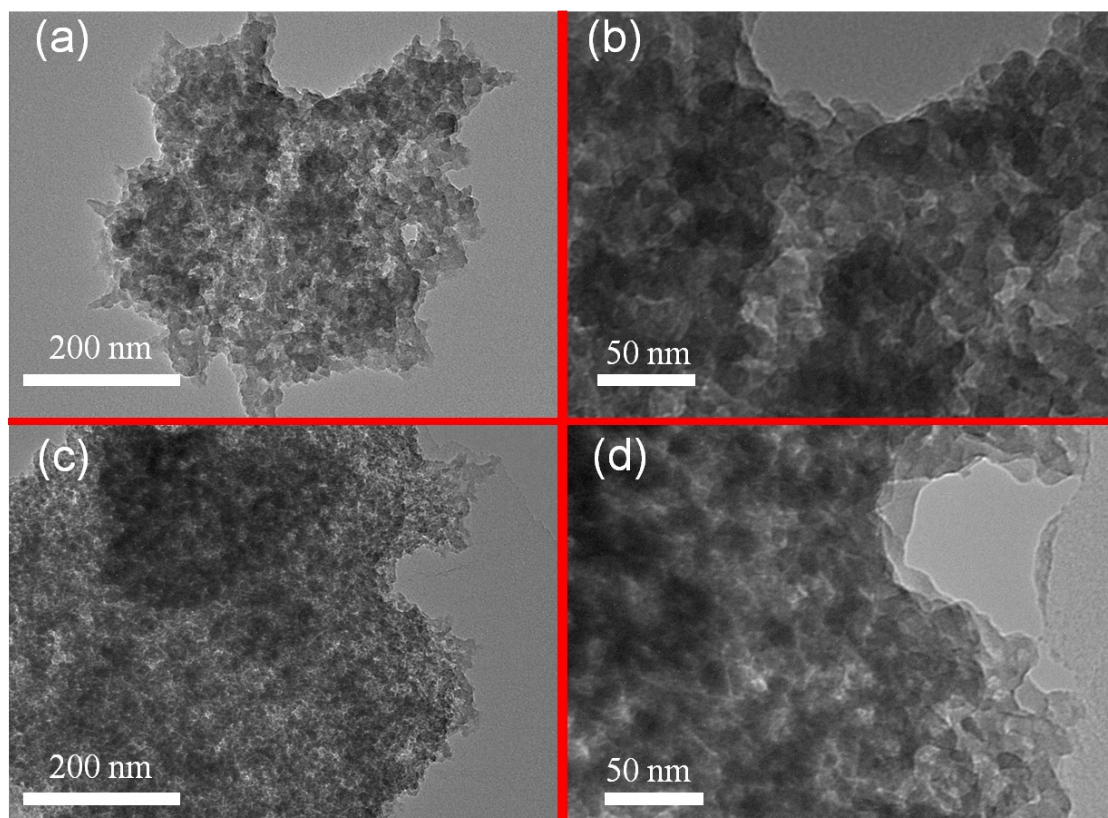

**Fig. S10** TEM images of SiO<sub>2</sub> aerogels with atmospheric drying: (a, b) M-13; (c, d) M-15.

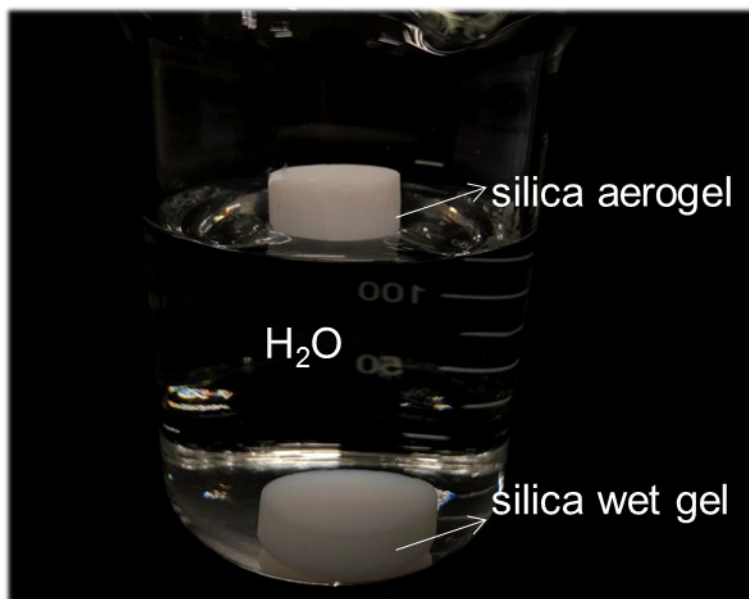

**Fig. S11** Hydrophobic phenomenon of sample.

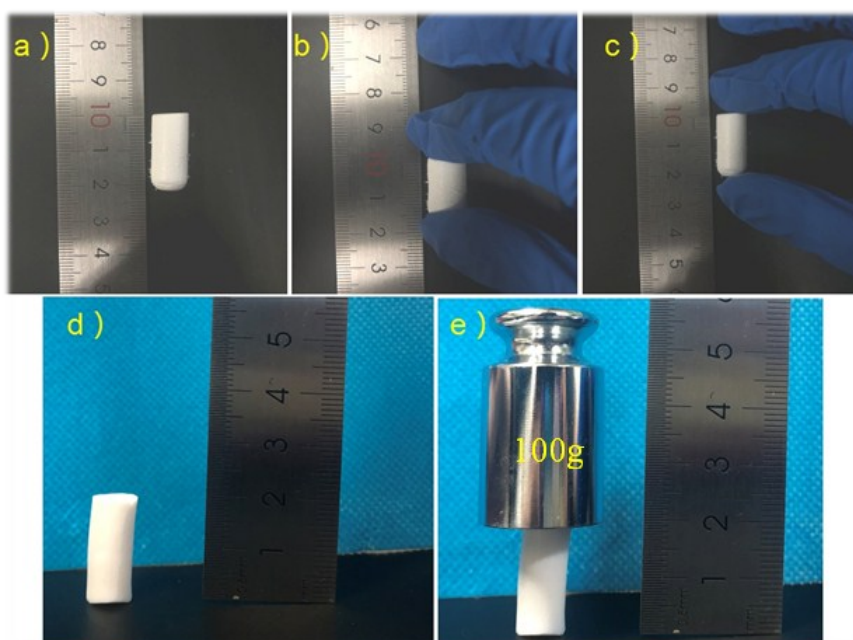

**Fig. S12** Mechanical properties for SiO<sub>2</sub> aerogels with atmospheric drying: (a, b, c) M-9; (d, e) M-13.

**Table S2** Bulk densities<sup>b</sup> of the samples M-8~15 dried via supercritical, freeze, atmospheric processes.

| NO.           | M-8    | M-9    | M-10   | M-11   | M-12   | M-13   | M-14   | M-15   |
|---------------|--------|--------|--------|--------|--------|--------|--------|--------|
| Supercritical | 0.2177 | 0.2318 | 0.2561 | 0.2822 | 0.3051 | 0.3185 | 0.3407 | 0.3612 |
| Freeze        | 0.2195 | 0.2352 | 0.2605 | 0.2863 | 0.3096 | 0.3206 | 0.3433 | 0.3657 |
| Atmospheric   | 0.2185 | 0.2367 | 0.2589 | 0.2852 | 0.3088 | 0.3214 | 0.3425 | 0.3651 |

<sup>b</sup>(Unit of density is g/cm<sup>3</sup>).

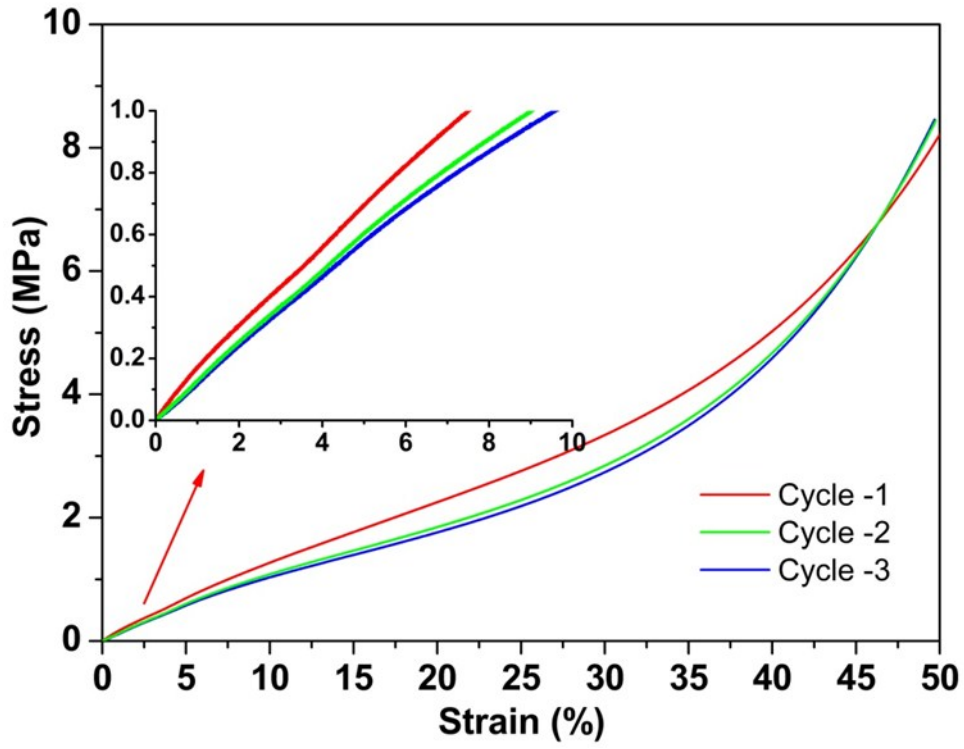

Fig. S13 Compression cycle of M-13 with atmospheric drying at 50% strain.
